# Supplementary material for: Priorities in Chronic nonbacterial osteomyelitis (CNO) – results from an international survey and roundtable discussions
Source: Springer Nature journal article supplement (doi:10.1186/s12969-023-00851-6), 2023-06-30
Supplement: MOESM3 [file 25561068]

A

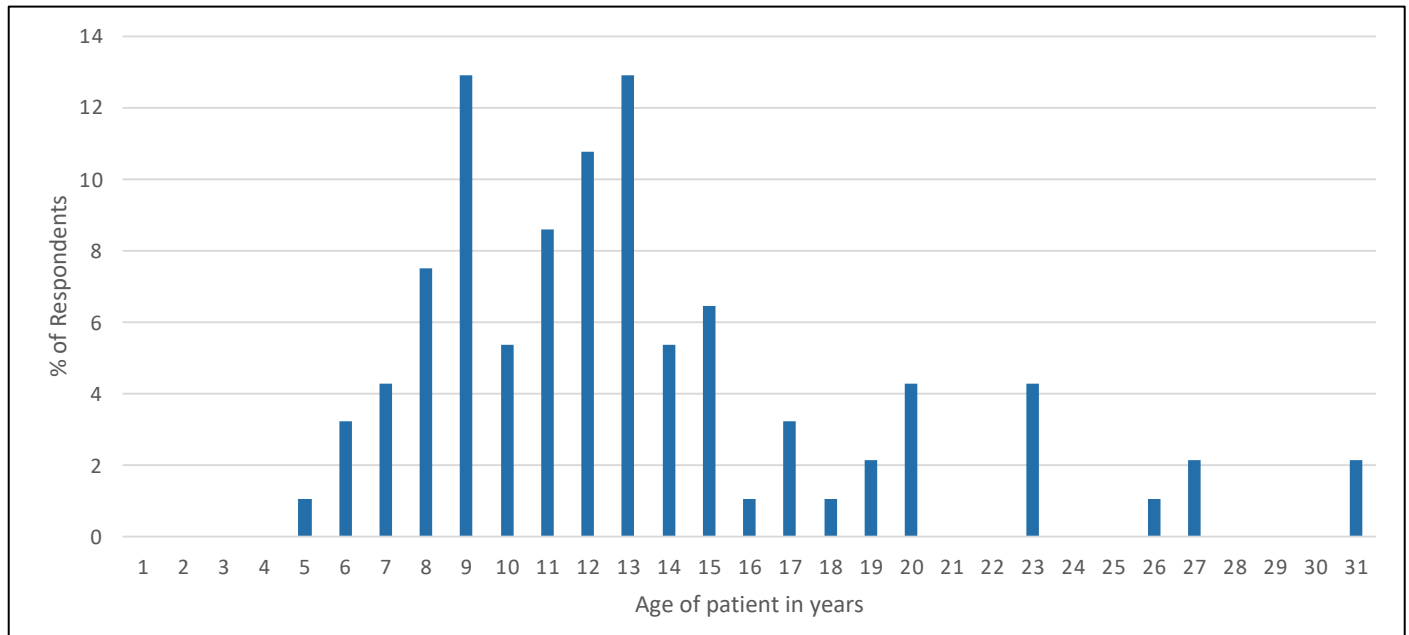

B

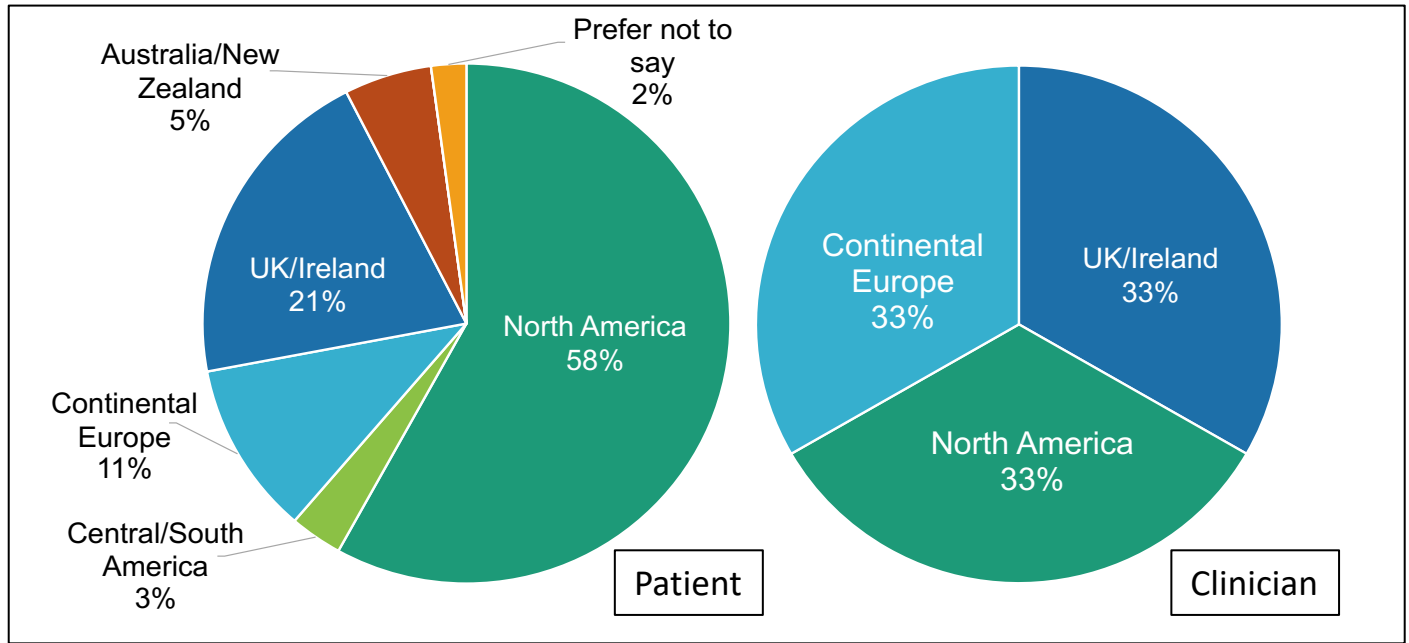

**Supplement 3: Survey demographics.** A) There were 93 responses to the patient questionnaire, 23% (21/93) were from children and young people (CYP) affected by CNO, and 77% (72/93) were from parents/carers. The ages of the patients ranged from 5-31 years (Median: 12). B) Of patients/carers, 58% (54/93) were from North America, 21% (19/93) were from the UK and Ireland, 11% (10/93) were from continental Europe, and 10% (10/93) were from other regions (including Australia, New Zealand, Central and South America). Responses from clinicians/clinical academics were equally distributed between North America, the UK, and continental Europe (all 7/21, 33.3%).
